# Functional Role of Glutamine 28 and Arginine 39 in Double Stranded RNA Cleavage by Human Pancreatic Ribonuclease

Md. Tabish Rehman<sup>2</sup>, Punyatirtha Dey<sup>1</sup>, Md. Imtaiyaz Hassan<sup>2</sup>, Faizan Ahmad<sup>2</sup>, Janendra K. Batra<sup>1\*</sup>

<sup>1</sup> Immunochemistry Laboratory, National Institute of Immunology, New Delhi, India, <sup>2</sup> Centre for Interdisciplinary Research in Basic Sciences, New Delhi, India

## Abstract

Human pancreatic ribonuclease (HPR), a member of RNase A superfamily, has a high activity on double stranded (ds) RNA. By virtue of this activity HPR appears to be involved in the host-defense against pathogenic viruses. To delineate the mechanism of dsRNA cleavage by HPR, we have investigated the role of glutamine 28 and arginine 39 of HPR in its activity on dsRNA. A non-basic residue glycine 38, earlier shown to be important for dsRNA cleavage by HPR was also included in the study in the context of glutamine 28 and arginine 39. Nine variants of HPR respectively containing Q28A, Q28L, R39A, G38D, Q28A/R39A, Q28L/R39A, Q28A/G38D, R39A/G38D and Q28A/G38D/R39A mutations were generated and functionally characterized. The far-UV CD-spectral analysis revealed all variants, except R39A, to have structures similar to that of HPR. The catalytic activity of all HPR variants on single stranded RNA substrate was similar to that of HPR, whereas on dsRNA, the catalytic efficiency of all single residue variants, except for the Q28L, was significantly reduced. The dsRNA cleavage activity of R39A/G38D and Q28A/G38D/R39A variants was most drastically reduced to 4% of that of HPR. The variants having reduced dsRNA cleavage activity also had reduction in their dsDNA melting activity and thermal stability. Our results indicate that in HPR both glutamine 28 and arginine 39 are important for the cleavage of dsRNA. Although these residues are not directly involved in catalysis, both arginine 39 and glutamine 28 appear to be facilitating a productive substrate-enzyme interaction during the dsRNA cleavage by HPR.

**Citation:** Rehman MT, Dey P, Hassan MI, Ahmad F, Batra JK (2011) Functional Role of Glutamine 28 and Arginine 39 in Double Stranded RNA Cleavage by Human Pancreatic Ribonuclease. PLoS ONE 6(3): e17159. doi:10.1371/journal.pone.0017159

**Editor:** Petri Kursula, University of Oulu, Germany

**Received:** August 25, 2010; **Accepted:** January 21, 2011; **Published:** March 8, 2011

**Copyright:** © 2011 Rehman et al. This is an open-access article distributed under the terms of the Creative Commons Attribution License, which permits unrestricted use, distribution, and reproduction in any medium, provided the original author and source are credited.

**Funding:** This work was supported by grants to the National Institute of Immunology from the Department of Biotechnology, Government of India, and a grant number SP/SO/BB-01/2003 from the Department of Science and Technology, Government of India to JKB. MTR and PD were supported by senior research fellowships from Council of Scientific and Industrial Research, India. The funders had no role in study design, data collection and analysis, decision to publish, or preparation of the manuscript.

**Competing Interests:** The authors have declared that no competing interests exist.

\* E-mail: janendra@nii.res.in

These authors contributed equally to this work.

## Introduction

Human pancreatic ribonuclease (HPR) is a member of an ancient superfamily of proteins, called RNase A superfamily [1]. Unlike the other members of the family, HPR displays substantial activity on double stranded (ds) RNA even under conditions in which dsRNA maintains stable secondary structure [2]. This activity is unrelated to digestion and is thought to be involved in the host-defense against pathogenic viruses [2,3]. HPR was found to be associated with  $\beta$ -core preparations of human chorionic gonadotropin that showed anti-HIV replication effects [4]. Apart from HPR, bovine seminal ribonuclease (BS-RNase) and douc langur pancreatic ribonuclease (DPR), also show high dsRNA cleaving activity [5]. As compared to bovine pancreatic ribonuclease, RNase A, HPR and DPR are two logs more active on synthetic double stranded homopolymer polyA.polyU, whereas BS-RNase is one log more active [6,7]. The members of RNase A superfamily cleave single stranded (ss) RNA by a transesterification reaction, which requires linear arrangement of the 2' oxygen atom, 5' oxygen atom and the intermediate phosphorus atom [8]. This 'inline' orientation of phosphodiester bond is not possible in dsRNA, which adopts helical secondary

structure [9]. It was proposed that an array of positively charged residues present around the active site enables HPR and BS-RNase to destabilize the secondary structure of dsRNA thereby facilitating its cleavage [2,9–11]. Figure 1 shows a multiple sequence alignment of HPR, DPR, BS-RNase and RNase A. DPR, BS-RNase and RNase A have respectively 94, 72 and 70% sequence similarity to HPR with all disulphide bonds and catalytic residues conserved (Figure 1). HPR has six additional basic residues, arginine 4, lysine 6, arginine 32, lysine 62, lysine 74 and lysine 102 around its active site, which are either absent in RNase A or replaced by non-basic residues. These unique basic residues were proposed to be responsible for the high dsRNA cleavage activity of HPR [6]. It has been shown that the mutations of arginine 4 and lysine 102 to alanine individually decrease dsRNA cleavage activity by about 2-fold, however when, glycine 38 was also mutated along with arginine 4 and lysine 102, the dsRNA cleavage was remarkably reduced [6]. Recently, we have reported that lysine 6, arginine 32, lysine 62 and lysine 74 do not play a direct role in the dsRNA cleavage activity of HPR, however lysine 6, lysine 74 and lysine 62 appear to be involved in general catalysis, structural integrity and stability and DNA helix unwinding activity of HPR [12].

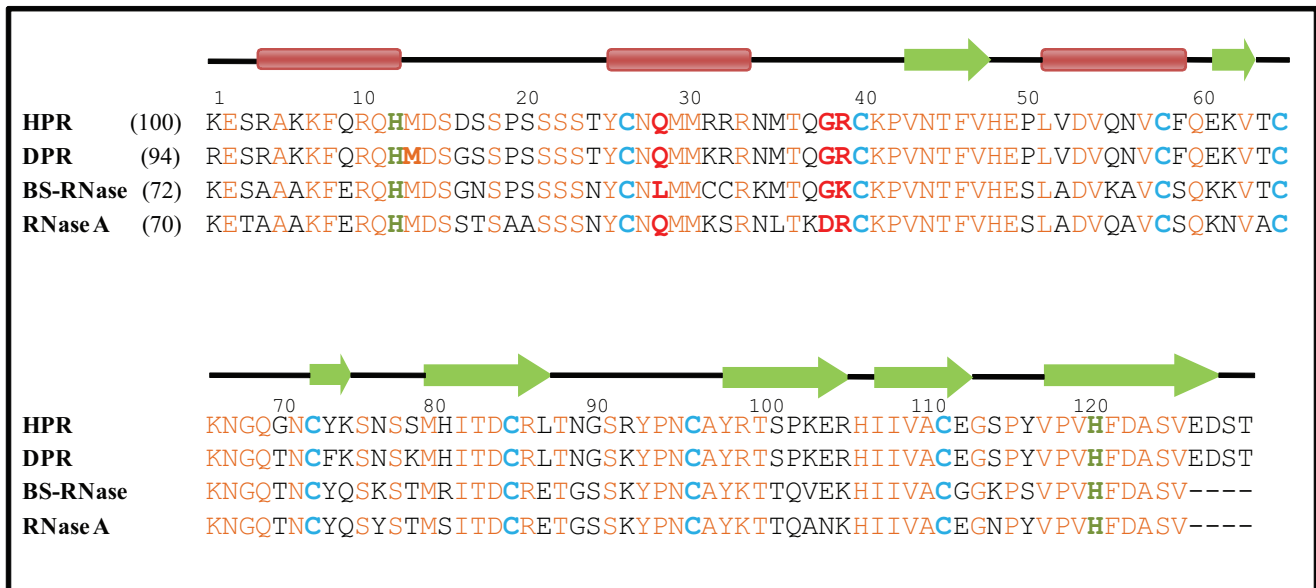

**Figure 1. Sequence alignment of HPR with other ribonucleases.** The sequences of ribonucleases were taken from protein data bank their PDB Ids being: HPR, human pancreatic ribonuclease (1DZA); BS-RNase, bovine seminal ribonuclease (1BSR); RNase A: bovine pancreatic ribonuclease (3JW1). The Swiss-Prot ID of DPR, Douc Pancreatic Ribonuclease is Q8SPN4.1. In the parenthesis is given the percent amino acid sequence similarity between different ribonucleases with respect to HPR. The secondary structures are shown at the top of sequences as,  $\alpha$ -helices in brown filled box and  $\beta$ -strands in green filled arrow while the loop residues as black line. The identical residues are shown in orange and the conserved cysteine residues are highlighted in light blue. The active site residues, His12 and His119 are shaded in green while the residues under investigation, Gln28, Gly38 and Arg39 in the current study are highlighted in red.  
doi:10.1371/journal.pone.0017159.g001

A number of non-basic residues that include glutamine 28, glycine 38, proline 42, aspartic acid 83 and alanine 122 have been shown to be important for dsRNA cleavage activity of pancreatic RNases of primates [13–14]. We and others have shown earlier that apart from the basic residues, one non-basic residue, glycine 38 is also important for the dsRNA cleavage activity of HPR [15,6]. RNase A lacks glycine at position 38 and instead it has an arginine at that position (Figure 1). Mutating glycine 38 to alanine caused a decrease in the activity of HPR on dsRNA [15,6]. It was proposed that the presence of glycine at position 38 improves the flexibility of the active site cleft which in turn improves the activity of HPR and BS-RNase on dsRNA [15]. In douc langur pancreatic

ribonuclease, which has similar dsRNA cleavage activity as that of HPR, glutamine 28 to leucine mutation has been shown to decrease the dsRNA cleavage activity by about 3-fold, similar to the glycine 38 to alanine mutation in HPR [13,14]. On the other hand, this mutation in bovine background increases dsRNA cleavage activity by about 4-fold [14]. In addition, arginine 39 which is located near the active site residue lysine 41 and present in RNase A as well appears to be important for the dsRNA cleavage activity of HPR [6].

In this study we have investigated the importance of arginine 39 and glutamine 28 for the dsRNA cleavage activity of HPR. Based on the earlier studies, importance of glycine 38 has also been

**Table 1. Steady state kinetics of HPR and variants on poly(A).poly(U).**

| Protein        | $K_m$ ( $\mu\text{M}$ ) | $k_{cat}$ ( $\text{min}^{-1}$ ) | $k_{cat}/K_m$ ( $\mu\text{M}^{-1} \text{min}^{-1}$ ) | Percent $k_{cat}/K_m$ |
|----------------|-------------------------|---------------------------------|------------------------------------------------------|-----------------------|
| HPR            | 13.5 $\pm$ 2.1          | 533.4 $\pm$ 45.1                | 39.5 $\pm$ 3.3                                       | 100 $\pm$ 8           |
| Q28A           | 52.0 $\pm$ 9.6          | 420.5 $\pm$ 69.1                | 8.1 $\pm$ 0.2                                        | 20 $\pm$ 0.5          |
| Q28L           | 11.5 $\pm$ 0.2          | 736.0 $\pm$ 37.7                | 64.0 $\pm$ 3.7                                       | 162 $\pm$ 9           |
| G38D           | 34.0 $\pm$ 3.4          | 498.9 $\pm$ 23.9                | 14.7 $\pm$ 1.1                                       | 37 $\pm$ 3            |
| R39A           | 48.5 $\pm$ 5.0          | 320.8 $\pm$ 18.7                | 6.6 $\pm$ 0.3                                        | 17 $\pm$ 1            |
| Q28A/G38D      | 33.8 $\pm$ 5.1          | 290.9 $\pm$ 33.4                | 8.6 $\pm$ 0.6                                        | 22 $\pm$ 1            |
| Q28A/R39A      | 57.2 $\pm$ 4.7          | 331.5 $\pm$ 37.9                | 5.8 $\pm$ 0.4                                        | 15 $\pm$ 2            |
| Q28L/R39A      | 56.6 $\pm$ 3.1          | 882.7 $\pm$ 96.1                | 15.6 $\pm$ 0.9                                       | 38 $\pm$ 2            |
| R39A/G38D      | 54.3 $\pm$ 7.0          | 94.1 $\pm$ 14.6                 | 1.7 $\pm$ 0.2                                        | 4 $\pm$ 0.5           |
| Q28A/G38D/R39A | 105.9 $\pm$ 32.6        | 133.9 $\pm$ 10.0                | 1.3 $\pm$ 0.3                                        | 3 $\pm$ 1             |
| RNase A        | 85.3 $\pm$ 5.0          | 11.0 $\pm$ 0.12                 | 0.1 $\pm$ 0.01                                       | 0.2 $\pm$ 0.02        |

The kinetic parameters were obtained as described in Materials and Methods. Each experiment was done three times and the standard errors are given.  
doi:10.1371/journal.pone.0017159.t001

**A.**

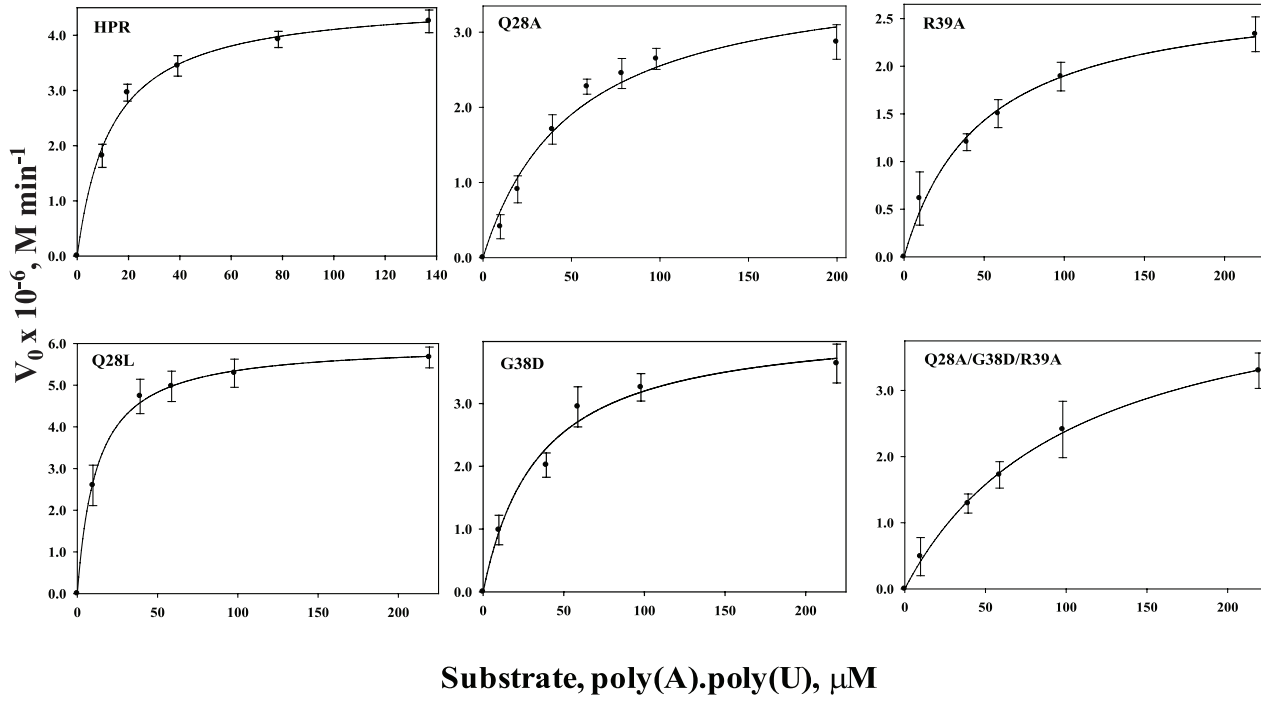

**B.**

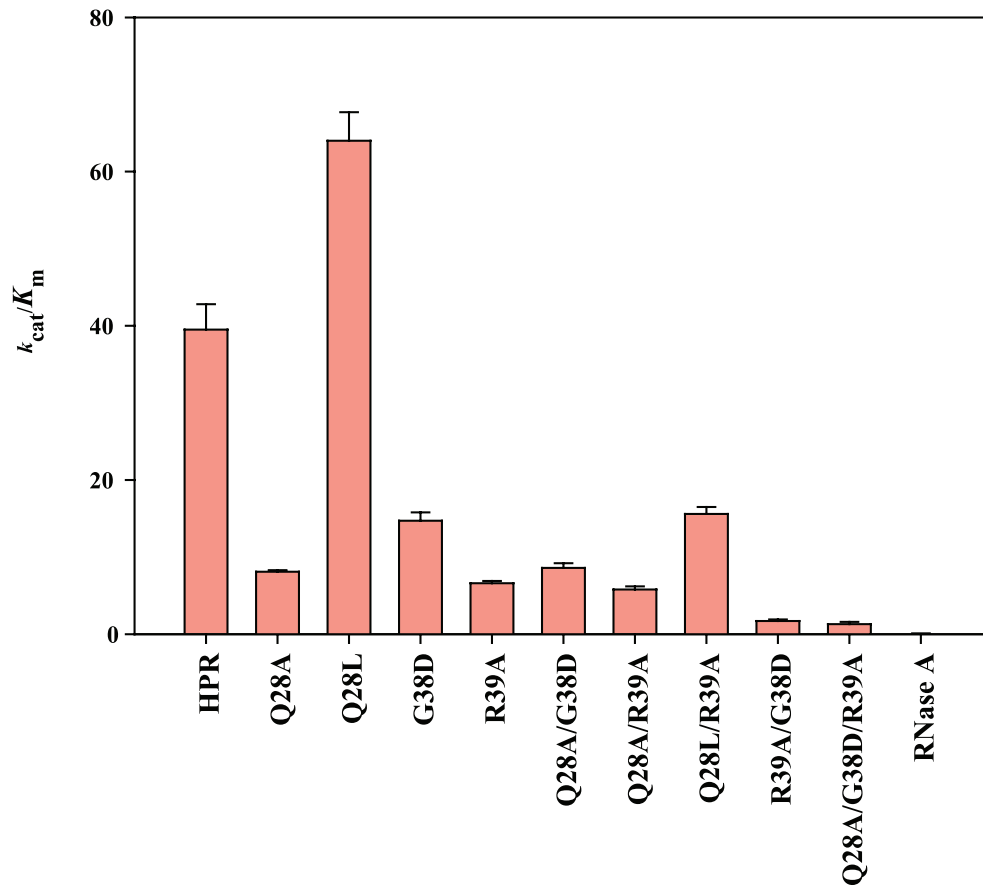

**Figure 2. Michaelis-Menten curves and catalytic efficiencies of HPR and its variants on poly(A).poly(U).** The ribonuclease activity of HPR and its variants was analysed on the double stranded RNA substrate, poly(A).poly(U) as described. A. Michaelis-Menten curves; B. Catalytic efficiencies ( $k_{cat}/K_m$ ).

doi:10.1371/journal.pone.0017159.g002

investigated in the context of arginine 39 and glutamine 28. Using nine variants of HPR namely Q28A, Q28L, G38D, R39A, Q28A/R39A, Q28L/R39A, R39A/G38D, Q28A/G38D and Q28A/G38D/R39A, this study demonstrates that arginine 39 is crucial for the dsRNA melting activity, and for this activity, at position 38 glycine is required. Both these residues are not directly involved in the RNA cleavage activity. At position 28, in place of glutamine, leucine is tolerated whereas alanine is detrimental for the dsRNA melting activity of HPR.

## Results

Based on studies on HPR [1,15], BS-RNase and douc langur pancreatic ribonuclease [13,14], Gly38, Arg39 and Gln28 residues in HPR have been proposed to be important for its dsRNA cleavage activity (Figure 1). In this study, we have probed the role of these residues in the dsRNA cleavage activity of HPR. Nine variants of HPR namely, Q28A, Q28L, G38D, R39A, Q28A/R39A, Q28L/R39A, Q28A/G38D, R39A/G38D and Q28A/G38D/R39A were prepared in which the targeted residues were mutated individually or in various combinations. Gln28 was mutated to alanine to eliminate the side chain, and to Leu to make it similar to the residue in BS-RNase (Figure 1). Similarly, Gly38 was mutated to aspartic acid to mimic the residue in RNase A (Figure 1). Arg39 was mutated to alanine to eliminate the side chain as well as the charge. In the double mutants and a triple mutant, the single mutations were incorporated in various combinations. All variants of HPR were analyzed for their ribonucleolytic activity on ds- and ss-RNA, melting activity towards a double stranded DNA and thermal stability to understand the mechanism by which these residues may be involved in the dsRNA cleavage by HPR.

### Steady-state kinetics on dsRNA and ssRNA substrates

HPR showed a 500-fold higher activity on dsRNA poy(A).poly(U) as compared to RNase A (Table 1). The  $K_m$  of HPR was about 7-fold lower and  $k_{cat}$  was 50-fold higher than that of RNase

A for the cleavage of poy(A).poly(U) (Table 1). When Gln28 was mutated to alanine in Q28A variant there was a 5-fold reduction in the catalytic efficiency ( $k_{cat}/K_m$ ) as compared to that of HPR, which was mainly due to an increased  $K_m$ . Mutation of Gln28 to Leu in Q28L variant, on the other hand did not significantly affect the  $K_m$  and  $k_{cat}$  and accordingly there was a minor increase in the catalytic efficiency of the variant (Table 1). In R39A variant, mutation of Arg39 to Ala resulted in a 5-fold reduction in the catalytic efficiency with a 3-fold increase in  $K_m$  and 1.5-fold reduction in  $k_{cat}$  (Table 1). As reported earlier [15], G38D variant had about 2.5-fold reduction in its catalytic efficiency which was mainly due to a 2.5-fold increase in its  $K_m$  value (Table 1). Combining the Q28A mutation with G38D or R39A respectively in Q28A/G38D and Q28A/R39A variants did not further change the 5-fold reduced catalytic efficiency seen in the Q28A variant (Table 1). The Q28L/R39A variant behaved like the R39A variant as it had about 4-fold reduced catalytic efficiency as compared to that of the Q28L variant. Combining G38D and R39A mutations resulted in the most drastic reduction in the catalytic efficiency and the R39A/G38D variant had only 4% activity with a significant increase in its  $K_m$  and reduction in the  $k_{cat}$  values. A triple mutant Q28A/G38D/R39A was also almost inactive like the R39A/G38D variant (Table 1). Figure 2A shows the Michaelis-Menten curves for HPR and few representative mutants with poly(A).poly(U) substrate. An overall comparison of catalytic efficiencies of all HPR variants with HPR on dsRNA, poly(A).poly(U) is shown in Figure 2B.

For ssRNA substrate, poly(C) cleavage,  $K_m$  of G38D, R39A, Q28L/R39A, R39A/G38D and Q28A/G38D/R39A was 1.5-2-fold lower than that of HPR, whereas all the other variants had similar  $K_m$ . The  $k_{cat}$  values of all the variants were very similar to that of HPR, except for the R39A, Q28L/R39A and Q28A/G38D/R39A variants which had 2-fold decreased  $k_{cat}$  values (Table 2). As compared to HPR the catalytic efficiency of R39A and Q28A/R39A decreased by about 30 and 45% respectively; while for all other variants it was similar to that of HPR. The  $K_m$  of RNase A for poly(C) was very similar to that of HPR, whereas its

**Table 2. Steady state kinetics of HPR and variants on poly(C).**

| Protein        | $K_m$ ( $\mu\text{M}$ ) | $k_{cat}$ ( $\times 10^5$ , $\text{min}^{-1}$ ) | $k_{cat}/K_m$ ( $\times 10^3$ , $\mu\text{M}^{-1} \text{min}^{-1}$ ) | Percentage $k_{cat}/K_m$ |
|----------------|-------------------------|-------------------------------------------------|----------------------------------------------------------------------|--------------------------|
| HPR            | 82.3 $\pm$ 3.8          | 1.39 $\pm$ 0.04                                 | 1.69 $\pm$ 0.11                                                      | 100 $\pm$ 6              |
| Q28A           | 73.9 $\pm$ 5.3          | 1.10 $\pm$ 0.02                                 | 1.49 $\pm$ 0.09                                                      | 88 $\pm$ 5               |
| Q28L           | 80.4 $\pm$ 3.4          | 1.00 $\pm$ 0.05                                 | 1.24 $\pm$ 0.04                                                      | 73 $\pm$ 2               |
| G38D           | 48.0 $\pm$ 3.8          | 1.17 $\pm$ 0.04                                 | 2.44 $\pm$ 0.11                                                      | 144 $\pm$ 6              |
| R39A           | 56.7 $\pm$ 5.2          | 0.62 $\pm$ 0.02                                 | 1.09 $\pm$ 0.07                                                      | 64 $\pm$ 4               |
| Q28A/G38D      | 91.0 $\pm$ 14.5         | 1.10 $\pm$ 0.02                                 | 1.21 $\pm$ 0.15                                                      | 72 $\pm$ 9               |
| Q28A/R39A      | 99.3 $\pm$ 3.7          | 0.90 $\pm$ 0.03                                 | 0.91 $\pm$ 0.06                                                      | 54 $\pm$ 3               |
| Q28L/R39A      | 43.5 $\pm$ 3.8          | 0.74 $\pm$ 0.04                                 | 1.70 $\pm$ 0.10                                                      | 101 $\pm$ 6              |
| R39A/G38D      | 60.9 $\pm$ 10.0         | 0.99 $\pm$ 0.06                                 | 1.63 $\pm$ 0.20                                                      | 96 $\pm$ 12              |
| Q28A/G38D/R39A | 40.9 $\pm$ 12.1         | 0.66 $\pm$ 0.03                                 | 1.61 $\pm$ 0.27                                                      | 95 $\pm$ 16              |
| RNase A        | 114.2 $\pm$ 3.5         | 15.3 $\pm$ 0.73                                 | 13.4 $\pm$ 0.27                                                      | 793 $\pm$ 16             |

The kinetic parameters were obtained as described in Materials and Methods. Each experiment was done three times and the standard errors are given.

doi:10.1371/journal.pone.0017159.t002

**A.**

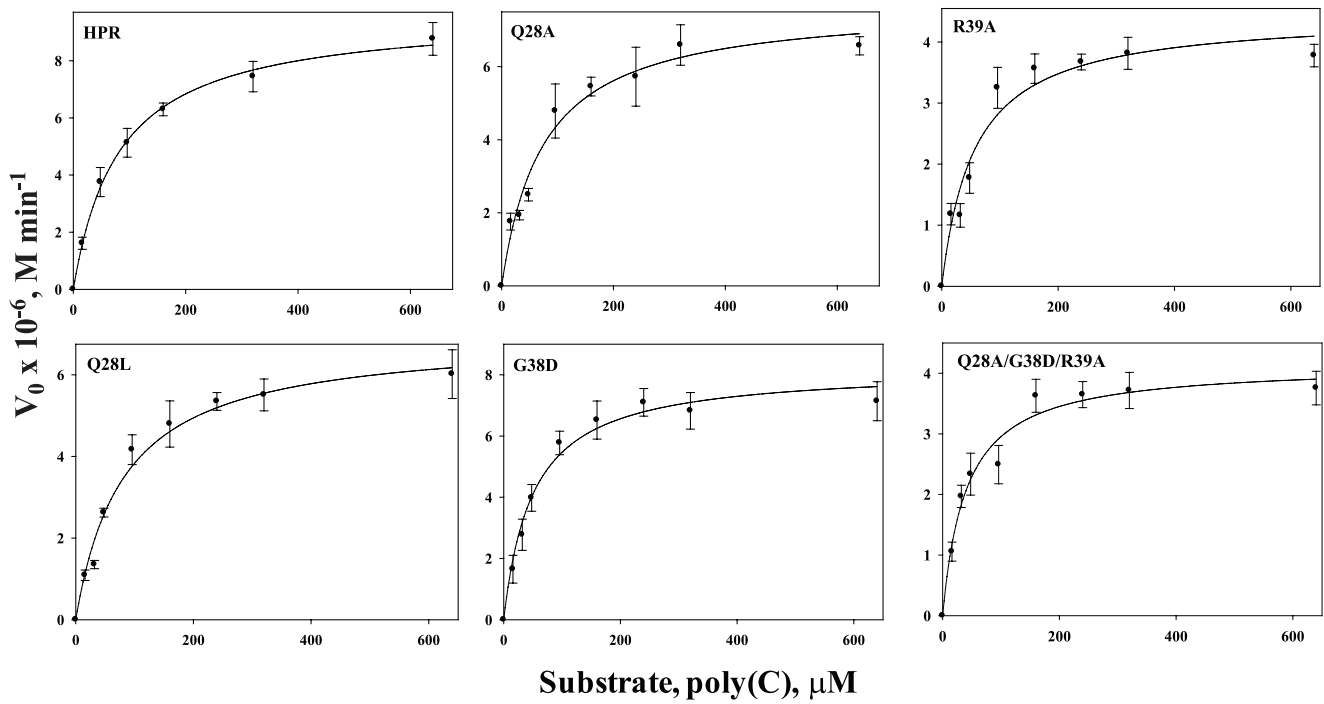

**B.**

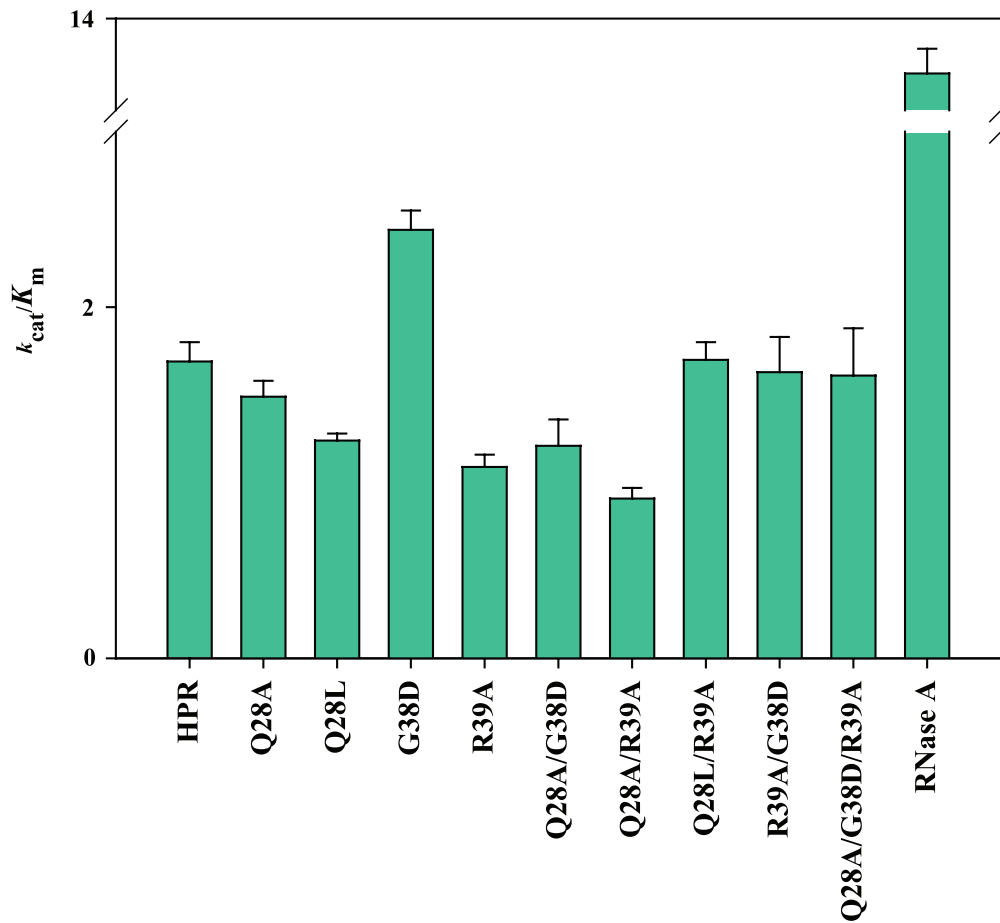

**Figure 3. Michaelis-Menten curves and catalytic efficiencies of HPR and its variants on poly(C).** The ribonuclease activity of HPR and its variants was analysed on the single stranded RNA substrate, poly(C) as described. A. Michaelis-Menten curves; B. Catalytic efficiencies ( $k_{cat}/K_m$ ). doi:10.1371/journal.pone.0017159.g003

$k_{cat}$  and  $k_{cat}/K_m$  were approximately 11- and 8-fold higher than that of HPR, respectively (Table 2). Figure 3A shows the Michaelis-Menten curves for HPR and few representative mutants with poly(C) substrate. An overall comparison of catalytic efficiencies of all HPR variants with HPR on ssRNA poly(C) is shown in Figure 3B.

### Characterization of structure and stability of HPR variants

The effects of the mutations on the secondary structure of the HPR and variants were studied by CD-spectral analysis in the far-UV region (Figure 4). The crystal structure of the wild type HPR is not known, however, a mutant of this protein (PM7) was crystallized, and its three dimensional structure was determined [16]. PM7 belongs to the group of  $\alpha+\beta$  proteins, and it has 20%  $\alpha$ -helix and 34%  $\beta$ -sheet. The CD spectral analysis revealed HPR and all its single amino acid variants (Figure 4A) and double amino acid variants (Figure 4B) to possess a compact  $\alpha+\beta$  structure, with a characteristic minimum at 208 nm. The far-UV CD spectra of the variants, except for the R39A, did not show any major differences in their secondary structure as compared to HPR (Figure 4A). The R39A variant had a reduction in its helical content (Figure 4A). The far-UV CD is an excellent technique to measure conformational changes upon introduction of mutations in proteins;  $[\theta]_{222}$  is used as a probe to measure changes in  $\alpha$  and  $\beta$  structure [17]. From the far-UV CD spectra of HPR and all nine mutants, values of  $[\theta]_{222}$  were estimated and are shown in Figure 4C. Except for the R39A mutant, which had a reduced  $[\theta]_{222}$  value, the  $[\theta]_{222}$  of all other mutants were not significantly different from that of the wild type protein.

To see if the mutations affected the stability, the melting profiles of HPR and its variants were monitored by observing changes in  $[\theta]_{222}$  in the temperature range 20–85°C. The heat-induced denaturation curves were analysed for the fraction denatured,  $f_D$  values using equation 1. Figure 5 shows plots of  $f_D$  values for HPR and its variants vs temperature. The denaturation curves for HPR and Q28L were very similar, whereas there was a shift in the denaturation curves of Q28A, G38D, R39A, Q28A/R39A, Q28L/R39A, Q28A/G38D, R39A/G38D and Q28A/G38D/

R39A towards lower temperatures (Figure 5). The  $T_m$ , temperature at which  $f_D$  equals 0.5, of Q28A, Q28L and G38D were very close to that of HPR (Table 3). However, R39A, Q28A/G38D, Q28A/R39A, Q28L/R39A, R39A/G38D and Q28A/G38D/R39A variants showed a remarkable decrease in their thermal stabilities (Table 3).

### Helix unwinding activity of HPR and variants

Although no direct experimental evidence for dsRNA destabilizing activity of HPR or any other pancreatic RNase is available, dsDNA melting activity of HPR and BS-RNase is well documented, and has been extrapolated for the melting of dsRNA [5,7]. The helix destabilizing activity of HPR and its variants was monitored on dsDNA, poly(dA-dT).poly(dA-dT). As shown in Figure 6, HPR showed a remarkable early helix destabilizing activity and this activity was not compromised by Q28L mutation. The DNA in the presence of HPR and Q28L started melting around 43°C while DNA alone started to melt around 53°C (Figure 6A). All other variants showed poor ability to melt DNA even at higher temperatures (Figure 6A, B). The melting temperatures,  $T_m$  of DNA alone, and in the presence of HPR and HPR variants are given in Table 4. The  $T_m$  of DNA alone was 57.5°C, while that with HPR was 52.6°C which was very similar to that with the Q28L variant (Table 4). However, the  $T_m$  of DNA with Q28A/R39A, R39A/G38D and Q28L/R39A variants were similar to that of DNA alone (Table 4). The helix destabilizing activity of Q28A, G38D, R39A, Q28A/G38D and Q28A/G38D/R39A was found to be much more compromised as  $T_m$  of DNA with these variants was much higher (Table 4). RNase A also was found to be poor in melting dsDNA (Table 4).

### In silico analysis of HPR variants

The superimposed structures of HPR and RNase A are very similar with a minimal root mean square deviation across main chain carbon atoms (Figure 7). The results of contact program revealed that main chain and side chain atoms of residues Gln28, Gly38 and Arg39 form 22, 14 and 19 interactions with protein atoms respectively (Table 5). Mutation of these residues with

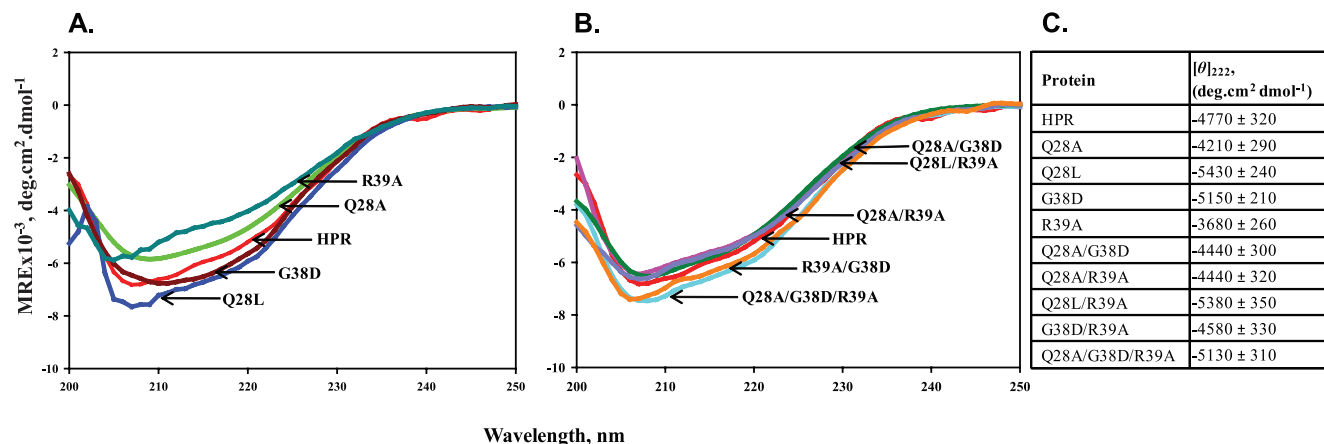

**Figure 4. CD spectra of HPR and its variants.** CD spectra were recorded in the far-UV region (200–250 nm) at pH 7.4 and 25°C. The spectra are presented as mean residue ellipticity, expressed in degrees.cm<sup>2</sup>.dmol<sup>-1</sup>. Panel A: CD spectra of HPR, Q28A, Q28L, G38D and R39A. Panel B: CD spectra of HPR, Q28A/G38D, Q28A/R39A, Q28L/R39A, R39A/G38D and Q28A/G38D/R39A. Panel C:  $[\theta]_{222}$  of HPR and its variants. doi:10.1371/journal.pone.0017159.g004

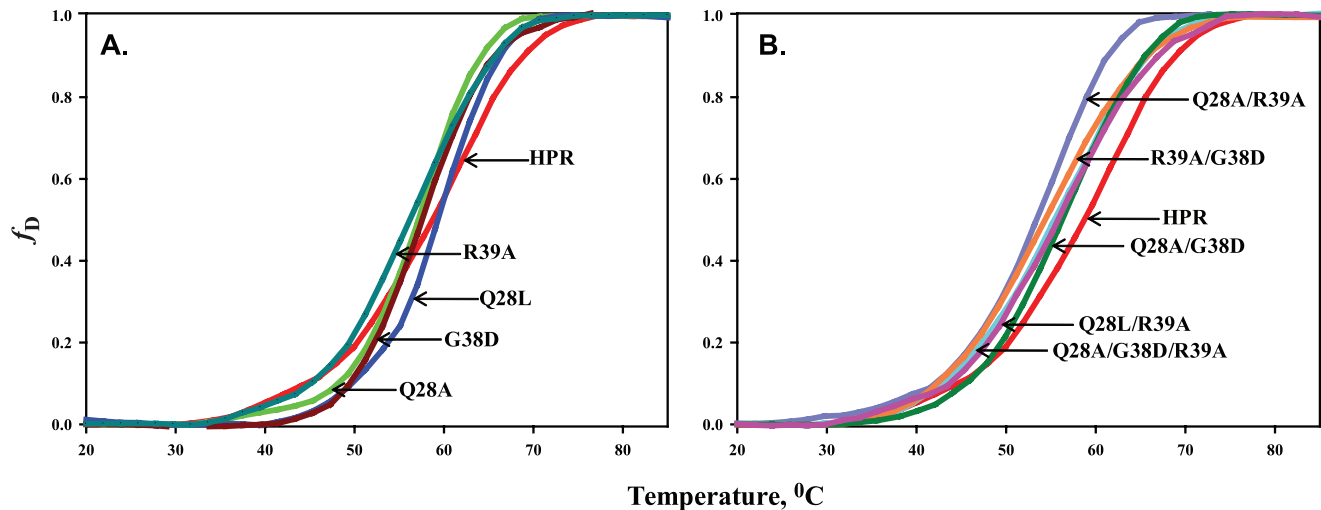

**Figure 5. Thermal denaturation profiles of HPR and its variants.** Heat induced unfolding curves of HPR and its variants are shown as plots of  $f_D$  values vs temperature.  $f_D$  is the fraction of the protein in denatured state as defined in the text. *Panel A:* denaturation profiles of HPR, Q28A, Q28L, G38D and R39A. *Panel B:* denaturation profile of HPR, Q28A/G38D, Q28A/R39A, Q28L/R39A, R39A/G38D and Q28A/G38D/R39A. doi:10.1371/journal.pone.0017159.g005

indicated residues, barring Gln28 to Leu, caused a significant change in the number of interactions mainly offered by side chain atoms (Table 5). As shown in Figure 8A, Gln28 and Thr24 form one hydrogen bond and one van der Waal interaction through their side chain atoms, and substitution of Gln28 with Ala results in the elimination of these interactions. However, when Gln28 is mutated to Leu, the strong interaction of Thr24 is maintained with Leu28 through the side chain atoms of respective residues (Figure 8A). In HPR, Gly38 lies in close vicinity of Tyr92, however there is no interaction between the two residues (Figure 8B). However, on mutating Gly38 to Asp two new interactions were observed between Asp38 and Tyr92 (Figure 8B). Arg39 does not show any interaction with any distant protein atom, though it shows few interactions with Gly38 and Cys40 due to its side chain atoms (Figure 8C). On mutating Arg39 to Ala these two interactions were altered (Figure 8C).

## Discussion

HPR is a member of single strand preferring ribonuclease A superfamily. However, HPR exhibits a remarkably high activity against double stranded RNA. This high dsRNA cleavage activity of HPR suggests the enzyme to be playing a role in host defense. In this study we have investigated the role of glutamine 28, glycine 38 and arginine 39 in the dsRNA cleavage activity of HPR. RNase A has a series of base and phosphate binding sites, in addition to the catalytic site, that help in its binding to RNA. Evidence for specific binding extending beyond the active site has been obtained from crystallographic analyses of several RNase A-nucleotide complexes viz d(CpA) [18], ApC [19], pTp [20], and other studies including NMR [21,22]. The crystal structure of a d(ApTpApApG).RNase A complex solved by X-ray diffraction shows the existence of a specific substrate recognition region on RNase A that extends beyond the active site [23]. According to this structure the side chains of Gln69, Asn71 and Glu111 may constitute a malleable binding site capable of establishing various hydrogen bonds depending on the nature of the stacked bases [23]. For polynucleotide substrates, remote subsites of interactions have been studied in detail in RNase A for poly (C) [24–26]. All these subsites are conserved in HPR, and the residues studied here are not part of those subsites. Figure 7 shows a superimposition of HPR and RNase A-Uridine-5'-monophosphate complex indicating that the substrate binds in pyrimidine binding site and the residues studied here are far away from the path of the substrate [27]. Our results show that the substitutions of residues Gln28, Gly38 and Arg39 alone or in combination in HPR do not affect its catalytic activity on single stranded RNA substrate poly (C) indicating that these residues in HPR are not involved in the interaction with long chain single stranded substrate poly(C). However, on dsRNA, poly(A).poly(U), HPR variants Q28A, R39A, Q28A/R39A and Q28A/G38D were 5- to 7-fold less active than HPR and this decrease was because of a parallel increase in their  $K_m$  values, as their  $k_{cat}$  were similar to that of the wild type HPR. In RNase A-polynucleotide catalysis, mutation of substrate binding subsite residues has resulted in 2–16-fold increase in the  $K_m$  of the variants [14,15]. It appears that the side chains of Arg39 and Gln28 are involved in the interaction of

**Table 3. Transition temperatures of HPR and variants.**

| Protein        | $T_m$ , °C |
|----------------|------------|
| HPR            | 58.3±0.1   |
| Q28A           | 56.8±0.1   |
| Q28L           | 58.9±0.1   |
| G38D           | 56.5±0.4   |
| R39A           | 55.9±0.1   |
| Q28A/G38D      | 56.1±0.1   |
| Q28A/R39A      | 54.0±0.2   |
| Q28L/R39A      | 55.1±0.1   |
| R39A/G38D      | 54.2±0.2   |
| Q28A/G38D/R39A | 55.7±0.1   |

The transition temperatures were derived from the thermal denaturation curves of HPR and its variants. Each experiment was done three times and the standard errors are given.

doi:10.1371/journal.pone.0017159.t003

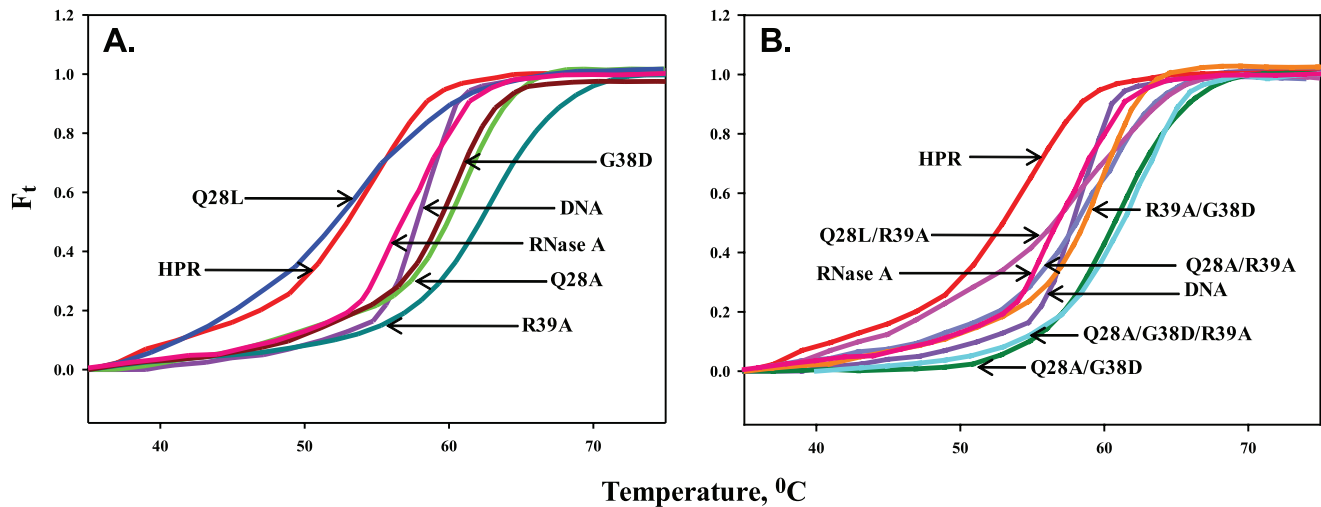

**Figure 6. Effect of HPR and its variants on thermal transition profile of double stranded DNA poly(dA–dT).poly(dA–dT).** The thermal transition profiles of DNA alone or with protein were studied spectrophotometrically at 260 nm in 10 mM MOPS buffer containing 50 mM NaCl (pH 7.5). Melted fraction of DNA ( $F_t$ ) was plotted against temperature. *Panel A*: thermal transition profile of DNA in the presence of HPR, Q28A, Q28L, G38D, R39A and RNase A. *Panel B*: thermal transition profile of DNA in the presence of HPR, Q28A/G38D, Q28A/R39A, Q28L/R39A, R39A/G38D, Q28A/G38D/R39A and RNase A.

doi:10.1371/journal.pone.0017159.g006

HPR with double stranded substrate, and these interactions improve the catalysis of dsRNA. In RNase A, arginine 39 is one of the nine basic residues that are believed to form a multisite cationic region involved in protein-RNA interactions [28]. It is possible that arginine 39 improves dsRNA cleaving activity of HPR by helping the active site, which is located deep within the concave cleft of the enzyme, to access dsRNA. Clearly, other residues would be involved in converting this unproductive enzyme-dsRNA complex into productive ssRNA-enzyme complex. As compared to HPR, the R39A variant was found to be less efficient in melting dsRNA substrate analog poly(dA–dT).poly(dA–dT) indicating that arginine 39 could be contributing directly or

indirectly towards the dsRNA melting activity of HPR. Although RNase A also contains arginine 39, it does not show dsDNA melting activity. It has been proposed that an aspartic acid present at position 38 in RNase A nullifies the positive charge of arginine 39 and prevents it from interacting with the negatively charged substrates [6]. Our *in silico* analysis confirms that though Arg39 side chain is not involved in holding the protein atoms together, it shows few interactions with Gly38 and Cys40, which are lost when Arg39 is substituted with Ala. It is shown earlier, that Gly38 in HPR has an important function, possibly, it may enhance the role of Arg39 as one of the many noncatalytic phosphate binding residues involved in the interaction of HPR protein with the double-helical substrate. In HPR, Gly38 is present on the surface in  $\alpha$ 2- $\beta$ 1 loop which forms a part of the V-shaped cleft in which the active site is located [16]. The absence of a larger side chain gives the polypeptide backbone at glycine residue much greater conformational flexibility than at other residues [16]. It appears that this conformational flexibility imparted to HPR around the active site, determines its ability to bind and melt duplex RNA, which is the first step in the hydrolysis of duplex RNA, and the presence of an aspartic acid instead of glycine at position 38, as in RNase A, diminishes the flexibility of the polypeptide backbone. In HPR, though Gly38 is in close vicinity of Tyr92, there is no contact between the two residues. However, mutation of Gly38 to Asp38 introduces one hydrogen bond and one van der Waal interaction with Tyr92.

The almost complete loss of dsRNA cleavage activity of R39A/G38D and Q28A/G38D/R39A can be explained by the absence of Arg39 which makes these proteins poor in melting the helix, and the presence of aspartic acid at position 38 which results in a compromised flexibility of the protein. The far-UV CD spectra and heat induced denaturation curves showed that R39A, Q28A and G38D had decreased stability. The effect of mutation on the stability of protein was more pronounced when R39A mutation was combined with Q28A, Q28L or G38D alone or Q28A and G38D together. The Q28L variant which was very similar to the native protein in terms of stability, showed similar DNA melting activity and in turn similar catalytic activity towards dsRNA as

**Table 4. Transition temperatures ( $T_m$ ) for the melting of DNA in the presence of HPR and variants.**

| Protein          | $T_m$ , °C | Change in $T_m$ compared to HPR, °C |
|------------------|------------|-------------------------------------|
| None (DNA alone) | 57.5±0.3   | -                                   |
| HPR              | 52.6±0.4   | -                                   |
| Q28A             | 59.4±0.6   | 6.8                                 |
| Q28L             | 52.5±0.4   | -0.1                                |
| G38D             | 59.7±0.5   | 7.1                                 |
| R39A             | 62.4±0.3   | 9.8                                 |
| Q28A/G38D        | 60.3±0.4   | 7.7                                 |
| Q28A/R39A        | 58.4±0.3   | 5.8                                 |
| Q28L/R39A        | 56.0±0.5   | 3.4                                 |
| R39A/G38D        | 58.1±0.5   | 5.5                                 |
| Q28A/G38D/R39A   | 61.7±0.6   | 9.1                                 |
| RNase A          | 56.3±0.7   | 3.7                                 |

The transition temperatures were derived from the thermal denaturation curves of DNA in the absence and presence of HPR and its variants. Each experiment was done three times and the standard errors are given.

doi:10.1371/journal.pone.0017159.t004



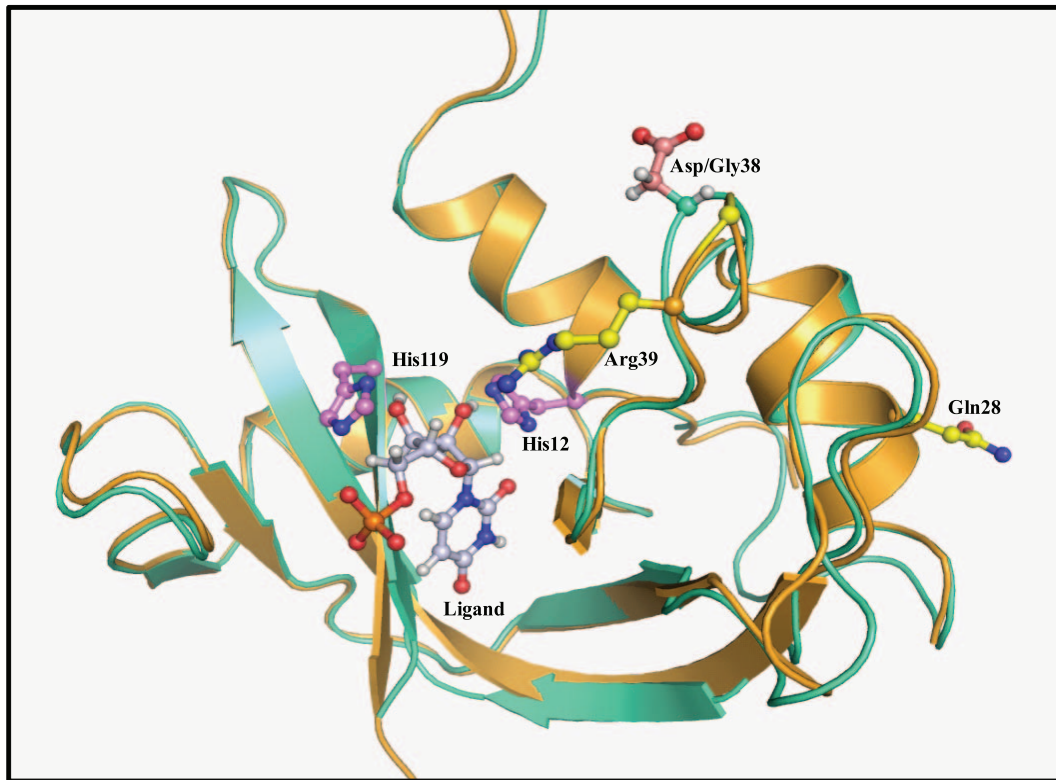

**Figure 7. Cartoon model of HPR (golden) superimposed over RNase A (light green).** The structure was drawn by taking atomic coordinates from Protein Data Bank in PyMol. PDB IDs of HPR and RNase A are 1DZA and 3JW1, respectively. All residues are shown in ball and stick model. The residues under investigation, Gln28, Gly38 and Arg39 are shown in yellow. Asp38 of RNase A is shown in red, active site residues His12 and His119 in light pink and the ligand, uridine-5'-monophosphate in grey.  
doi:10.1371/journal.pone.0017159.g007

that of the native enzyme. Thus, stability also appears to be an important contributor in the DNA melting activity of HPR.

In BS-RNase, Leu28 is known to increase the propensity of domain swapping, and thus facilitating the formation of non-covalent dimer. However, analysis by native PAGE showed that Q28L mutation in HPR did not promote the process of dimerization (data not shown). Our study shows that a leucine at position 28 can substitute glutamine as Q28L variant showed similar stability, helix unwinding activity and dsRNA cleavage activity as that of HPR. The observation is further validated by *in silico* analysis that shows both Gln28 and Leu28 to have interaction with Thr24 which is lost in Q28A variant. The crystal structure of BS-RNase monomer, in which Leu28 occurs naturally, shows that Leu28, in spite of being a non polar residue remains partially exposed to the solvent, like Gln28 in HPR. Thus, leucine in spite of being non-polar may form similar interactions with dsRNA as glutamine.

In conclusion, we have studied the importance of two residues, arginine 39 and glutamine 28 for the functional activity of HPR and found that although they are not directly involved in catalysis, both arginine 39 and glutamine 28 could be facilitating the formation of a productive dsRNA-enzyme complex during dsRNA cleavage by HPR.

## Materials and Methods

### Materials

Single stranded RNA polymer, polycytidylic acid (potassium salt), poly(C) was from GE Healthcare. Double stranded homopolymer polyadenylic acid-polyuridylic acid sodium salt,

poly(A).poly(U) and double stranded DNA poly(dA-dT).poly(dA-dT) were from Sigma. Other chemicals were of analytical grade.

### Construction and purification of HPR variants

The plasmid pHPR [29], which contains HPR cloned downstream of T7 promoter, was used as template for site-directed mutagenesis by overlapping primer extension by polymerase chain reaction. The mutations were confirmed by DNA sequencing. HPR and mutants were expressed in BL21 ( $\lambda$ DE3) strain of *E. coli*. The recombinant proteins were found to accumulate in the inclusion bodies from where they were solubilized, refolded and purified as described earlier [30,31]. Briefly, the inclusion bodies were solubilized in 6 M guanidine hydrochloride and renatured in 0.1 M Tris-HCl pH 8.0 containing 0.5 M arginine and 0.9 mM oxidized glutathione. The renatured proteins were dialyzed and purified by cation exchange chromatography using an S-sepharose column followed by gel filtration chromatography employing a Superose-12 column.

### CD spectral measurement of proteins

The far-UV CD spectra of HPR and its variants were recorded at 25°C in JASCO J-715 spectropolarimeter equipped with a Peltier-type temperature controller (PTC-348WI). The measurements were made in 50 mM phosphate buffer saline (PBS), pH 7.4 by using a quartz cell of 0.1 cm path length. Each spectrum was corrected for the blank contribution to the observed protein CD spectrum. The raw CD data at a given wavelength ( $\lambda$ ) were converted into mean residue ellipticity  $[\theta]_{\lambda}$ , ( $\text{deg cm}^2 \text{dmol}^{-1}$ ) by using the relation,  $[\theta]_{\lambda} = \theta_{\lambda} M_0 / 10lc$ , where  $\theta_{\lambda}$  is the observed

**Table 5.** Interactions of main chain and side chain atoms of Gln28, Gly38 and Arg39 with protein atoms.

| Source atom     | Target Residues           | Distance (Å) | Source atom     | Target Residues           | Distance (Å) | Source atom    | Target Residues          | Distance (Å) |
|-----------------|---------------------------|--------------|-----------------|---------------------------|--------------|----------------|--------------------------|--------------|
| <b>Gln28</b>    |                           |              | <b>Leu28</b>    |                           |              | <b>Ala28</b>   |                          |              |
| N               | 24 (THR)- O               | 2.97         | N               | 24 (THR)- O               | 2.97         | N              | 24 (THR)- O              | 2.97         |
|                 | 25 (TYR)- O               | 3.23         |                 | 25 (TYR)- O               | 3.23         |                | 25 (TYR)- O              | 3.23         |
|                 | 26 (CYS)- C               | 3.17         |                 | 26 (CYS)- C               | 3.17         |                | 26 (CYS)- C              | 3.17         |
|                 | 26 (CYS)- O               | 3.23         |                 | 26 (CYS)- O               | 3.23         |                | 26 (CYS)- O              | 3.23         |
|                 | 27 (ASN)- C <sup>β</sup>  | 3.12         |                 | 27 (ASN)- C <sup>β</sup>  | 3.12         |                | 27 (ASN)- C <sup>β</sup> | 3.12         |
| C <sup>α</sup>  | 27 (ASN)- O               | 2.75         | C <sup>α</sup>  | 27 (ASN)- O               | 2.75         | C <sup>α</sup> | 27 (ASN)- O              | 2.75         |
| C               | 29 (MET)- C               | 3.09         | C               | 29 (MET)- C               | 3.09         | C              | 29 (MET)- C              | 3.09         |
|                 | 27 (ASN)- C               | 3.08         |                 | 27 (ASN)- C               | 3.08         |                | 27 (ASN)- C              | 3.08         |
|                 | 27 (ASN)- O               | 3.09         |                 | 27 (ASN)- O               | 3.09         |                | 27 (ASN)- O              | 3.09         |
|                 | 30 (MET)- N               | 3.42         |                 | 30 (MET)- N               | 3.42         |                | 30 (MET)- N              | 3.42         |
| O               | 29 (MET)- C <sup>α</sup>  | 2.80         | O               | 29 (MET)- C <sup>α</sup>  | 2.80         | O              | 29 (MET)- C <sup>α</sup> | 2.80         |
|                 | 29 (MET)- C               | 3.08         |                 | 29 (MET)- C               | 3.08         |                | 29 (MET)- C              | 3.08         |
|                 | 32 (ARG)- C <sup>β</sup>  | 3.41         |                 | 32 (ARG)- C <sup>β</sup>  | 3.41         |                | 32 (ARG)- C <sup>β</sup> | 3.41         |
|                 | 32 (ARG)- C <sup>τ</sup>  | 3.25         |                 | 32 (ARG)- C <sup>τ</sup>  | 3.25         |                | 32 (ARG)- C <sup>τ</sup> | 3.25         |
|                 | 32 (ARG)- N               | 2.86         |                 | 32 (ARG)- N               | 2.86         |                | 32 (ARG)- N              | 2.86         |
|                 | 31 (ARG)- N               | 3.26         |                 | 31 (ARG)- N               | 3.26         |                | 31 (ARG)- N              | 3.26         |
|                 | 27 (ASN)- O               | 3.44         |                 | 27 (ASN)- O               | 3.44         |                | 27 (ASN)- O              | 3.44         |
| C <sup>β</sup>  | 29 (MET)- N               | 3.05         | C <sup>β</sup>  | 29 (MET)- N               | 3.02         | C <sup>β</sup> | 29 (MET)- N              | 3.07         |
| C <sup>γ</sup>  | 24 (THR)- O               | 3.33         | C <sup>γ</sup>  | 24 (THR)- O               | 3.47         |                |                          |              |
| N <sup>ε2</sup> | 24 (THR)- O <sup>γ1</sup> | 3.41         | C <sup>δ1</sup> | 24 (THR)- C               | 3.47         |                |                          |              |
| <b>Gly38</b>    |                           |              | <b>Asp38</b>    |                           |              |                |                          |              |
| N               | 36 (THR)- C               | 3.39         | N               | 36 (THR)- C               | 3.39         |                |                          |              |
|                 | 36 (THR)- O               | 3.06         |                 | 36 (THR)- O               | 3.06         |                |                          |              |
|                 | 92 (TYR)- C <sup>δ1</sup> | 3.48         |                 | 92 (TYR)- C <sup>δ1</sup> | 3.48         |                |                          |              |
|                 | 92 (TYR)- C <sup>ε1</sup> | 3.43         |                 | 92 (TYR)- C <sup>ε1</sup> | 3.43         |                |                          |              |
| C <sup>α</sup>  | 37 (GLN)- O               | 2.72         | C <sup>α</sup>  | 37 (GLN)- O               | 2.72         |                |                          |              |
| C               | 37 (GLN)- C               | 3.24         | C               | 37 (GLN)- C               | 3.24         |                |                          |              |
|                 | 37 (GLN)- O               | 3.25         |                 | 37 (GLN)- O               | 3.25         |                |                          |              |
|                 | 92 (TYR)- C <sup>γ</sup>  | 3.49         |                 | 92 (TYR)- C <sup>γ</sup>  | 3.49         |                |                          |              |
|                 | 39 (ARG)- C <sup>β</sup>  | 3.35         |                 | 39 (ARG)- C <sup>β</sup>  | 3.35         |                |                          |              |
| O               | 92 (TYR)- C <sup>γ</sup>  | 3.49         | O               | 92 (TYR)- C <sup>γ</sup>  | 3.49         |                |                          |              |
|                 | 39 (ARG)- C <sup>α</sup>  | 2.80         |                 | 39 (ARG)- C <sup>α</sup>  | 2.80         |                |                          |              |
|                 |                           |              | C <sup>β</sup>  | 37 (GLN)- C               | 2.83         |                |                          |              |
|                 |                           |              |                 | 37 (GLN)- O               | 2.55         |                |                          |              |
|                 |                           |              |                 | 39 (ARG)- N               | 3.38         |                |                          |              |
|                 |                           |              | C <sup>γ</sup>  | 37 (GLN)- C               | 3.41         |                |                          |              |
|                 |                           |              |                 | 37 (GLN)- O               | 3.38         |                |                          |              |
|                 |                           |              | O <sup>δ2</sup> | 37 (GLN)- O               | 3.41         |                |                          |              |
| Arg39           |                           |              | Ala39           |                           |              |                |                          |              |
| N               | 37 (GLN)- C               | 3.16         | N               | 37 (GLN)- C               | 3.16         |                |                          |              |
|                 | 37 (GLN)- O               | 3.17         |                 | 37 (GLN)- O               | 3.17         |                |                          |              |
| C <sup>α</sup>  | 38 (GLY)- O               | 2.80         | C <sup>α</sup>  | 38 (GLY)- O               | 2.80         |                |                          |              |
| C               | 40 (CYS)- C               | 3.16         | C               | 40 (CYS)- C               | 3.16         |                |                          |              |
| O               | 36 (THR)- C <sup>α</sup>  | 3.24         | O               | 36 (THR)- C               | 3.36         |                |                          |              |
|                 | 36 (THR)- C               | 3.36         |                 | 36 (THR)- C <sup>α</sup>  | 3.24         |                |                          |              |
|                 | 40 (CYS)- C               | 3.44         |                 | 40 (CYS)- C               | 3.44         |                |                          |              |
|                 | 40 (CYS)- C <sup>α</sup>  | 2.82         |                 | 40 (CYS)- C <sup>α</sup>  | 2.82         |                |                          |              |
| C <sup>β</sup>  | 38 (GLY)- C               | 3.35         | C <sup>β</sup>  | 38 (GLY)- C               | 3.24         |                |                          |              |
|                 | 40 (CYS)- N               | 3.30         |                 | 38 (GLY)- O               | 3.42         |                |                          |              |

**Table 5.** Cont.

| Source atom     | Target Residues            | Distance (Å) | Source atom | Target Residues | Distance (Å) | Source atom | Target Residues | Distance (Å) |
|-----------------|----------------------------|--------------|-------------|-----------------|--------------|-------------|-----------------|--------------|
| C <sup>γ</sup>  | 40 (CYS)- N                | 3.22         | 40 (CYS)- N |                 | 3.39         |             |                 |              |
| C <sup>δ</sup>  | 111 (GLU)- O <sup>ε2</sup> | 3.04         |             |                 |              |             |                 |              |
| C <sup>ε</sup>  | 115 (TYR)- C <sup>ε1</sup> | 3.38         |             |                 |              |             |                 |              |
| N <sup>η1</sup> | 112 (GLY)- O               | 3.45         |             |                 |              |             |                 |              |
|                 | 115 (TYR)- C <sup>δ1</sup> | 3.30         |             |                 |              |             |                 |              |
|                 | 115 (TYR)- C <sup>ε1</sup> | 3.48         |             |                 |              |             |                 |              |

doi:10.1371/journal.pone.0017159.t005

ellipticity (millidegree) at wavelength  $\lambda$ ,  $M_o$  is the mean residue weight of the protein,  $c$  is the protein concentration ( $\text{mg}/\text{cm}^3$ ), and  $l$  is the path length (cm). The concentration of HPR and its variants was calculated using  $\epsilon_{278} = 7446 \text{ M}^{-1}\text{cm}^{-1}$ .

### Steady state kinetics on poly(C)

The ribonucleolytic activity of HPR and variants was assayed on poly(C) as described earlier [10]. Briefly, an appropriate concentration of each protein that produced activity in the linear region at 20 min time point was used to determine the kinetic parameters of HPR and variants on single stranded RNA substrate poly (C). The enzyme concentration used was 70  $\mu\text{M}$  and the substrate was varied from 16 to 640  $\mu\text{M}$ . Different concentrations of substrate was incubated in 100 mM Tris-Cl (pH 7.5) with enzyme for 20 mins at

37°C. The reaction was stopped with 5% perchloric acid and 0.25% uranyl acetate. The undigested RNA was precipitated by incubating on ice for 30 min and separated from digested RNA by centrifugation. The amount of digested RNA was determined by measuring absorbance of the supernatant at 260 nm and the change in absorbance per unit time was converted to initial velocity. Kinetic parameters were deduced from the Michaelis-Menten plot of initial velocity vs substrate concentration. An absorption coefficient of  $6200 \text{ M}^{-1} \text{ cm}^{-1}$  per nucleotide at 260 nm was taken for the calculation of substrate and product concentrations.

### Steady state kinetics on poly(A).poly(U)

For the determination of steady state kinetic parameters on double stranded RNA substrate, poly(A).poly(U), appropriate

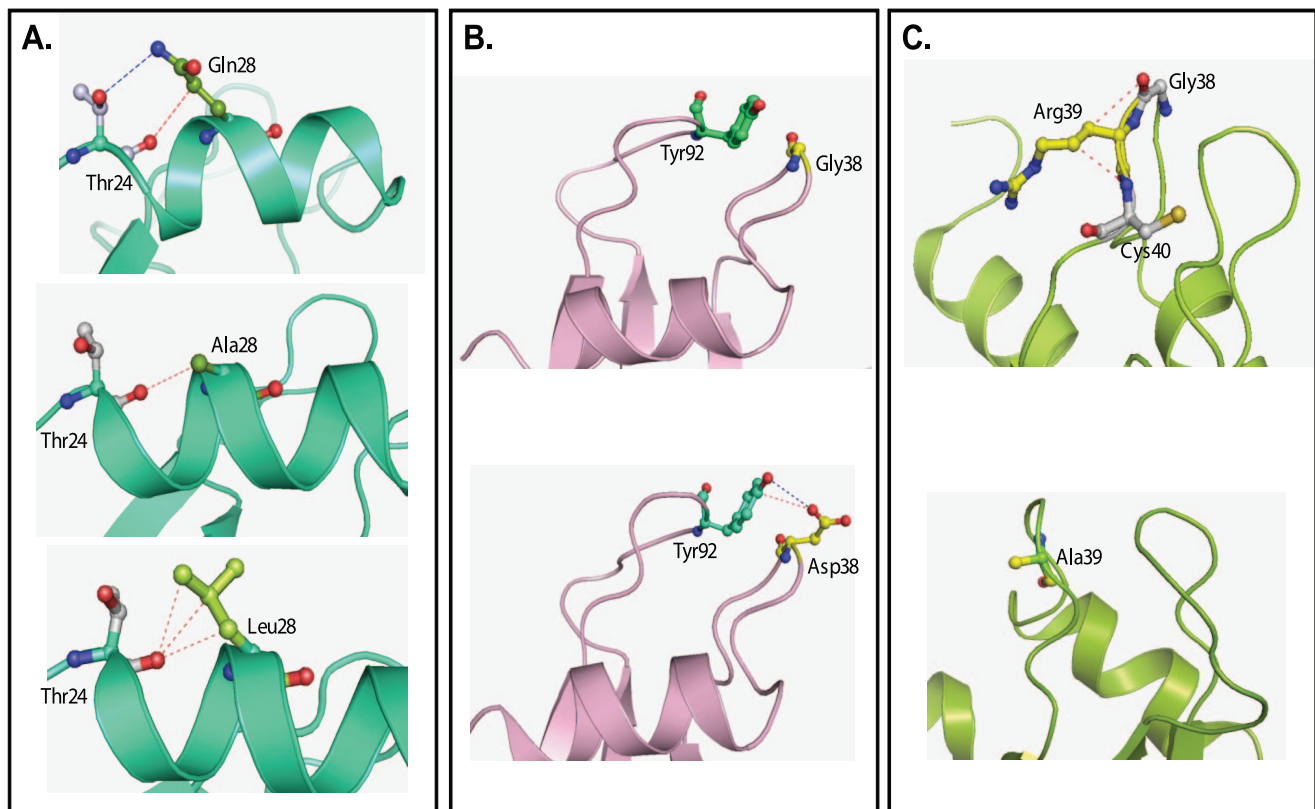

**Figure 8.** *In silico* analysis of HPR variants. The structures were drawn in PyMOL software using the coordinates of 1DZA (19). All important residues are shown in ball and stick model. The three panels show effect of respective mutations on various interactions in HPR variants. A. Gln28; B. Gly38; and C. Arg39. The hydrogen bond and van der Waal interactions are shown in blue and red dotted lines, respectively. doi:10.1371/journal.pone.0017159.g008

amount of the enzyme was mixed with different amounts of substrate in 0.1 M MOPS buffer (pH 7.5) containing 0.1 M sodium chloride [12]. The reaction mixture was transferred immediately to a cuvette of 1 cm path length, and the change in absorbance at 260 nm was monitored with time in a Perkin-Elmer Lambda Bio 20 spectrophotometer. Initial reaction velocity was calculated using  $\Delta\epsilon_{260} = 3400 \text{ M}^{-1}\text{cm}^{-1}$  for poly(A).poly(U). Substrate concentration was calculated using  $\epsilon_{260} = 6500 \text{ M}^{-1}\text{cm}^{-1}$  for poly(A).poly(U). The substrate range used was 10 to 220  $\mu\text{M}$  and the enzyme concentration used for HPR and variants was in the range 8.5–39.2 nM. The kinetic parameters were determined by non-linear regression analysis of the data fit to the Michaelis-Menten equation using Sigma plot software.

### Thermal denaturation of DNA substrate analog

Thermal denaturation of double stranded DNA poly (dA–dT).poly (dA–dT) in the absence and presence of proteins was monitored as described by Sorrentino et al. [5] with minor modifications. Briefly, 14  $\mu\text{g}/\text{ml}$  DNA was mixed with 28  $\mu\text{g}/\text{ml}$  of protein in 10 mM MOPS buffer containing 50 mM sodium chloride (pH 7.5) in a thermostatically controlled cuvette, and the change in absorbance at 260 nm was spectrophotometrically monitored in a temperature range of 35–80°C. The temperature was increased at 1°C per minute. The contribution of proteins to the absorbance of the mixture at 260 nm was negligible. The absorbance values of the free DNA and the complexes at various temperatures were normalized using the following equation:

$$F_t = (A_t - A^h) / (A_t^c - A^h)$$

In the above equation subscript t represents temperature in °C at which measurements are made.  $F_t$  is the normalized absorbance indicating the fraction of melted DNA;  $A_t$  is the absorbance at the given temperature;  $A^h$  is the minimum absorbance over all the temperatures used and represents the absorbance solely due to helical duplexes;  $A_t^c$  is the absorbance solely due to coil form of the polynucleotide.  $A_t^c$  was obtained by fitting a least squares straight line among data points from 60 to 80°C.

### Thermal denaturation of proteins

Heat-induced denaturation of HPR and its variants was carried out in JASCO J-715 spectropolarimeter equipped with a Peltier-

type temperature controller (PTC-348WT) with a heating rate of 1°C per minute. This scan rate was found to provide adequate time for equilibration. Changes in  $[\theta]_{222}$  of each protein was measured in the temperature range 20–85°C. After denaturation, the sample was immediately cooled down to measure the reversibility of the reaction at different temperatures. It was observed that data from renaturation experiments fell on the denaturation curve. All solution blanks showed negligible change in ellipticity with temperature and were, therefore, neglected during the data analysis. Assuming that heat induces a transition two-state transition (N (native) state  $\leftrightarrow$  D (denatured) state), each denaturation curve was analyzed for the fraction denatured,  $f_D$  using the relation,

$$f_D = (y(T) - y_N(T)) / (y_D(T) - y_N(T)) \quad (1)$$

where  $y(T)$  is the observed optical property at  $T^\circ\text{C}$ , and  $y_N(T)$  and  $y_D(T)$  are the optical properties of the native and denatured protein molecules at  $T^\circ\text{C}$ .  $T_m$ , the midpoint of thermal denaturation, is the temperature (°C) at which  $f_D$  equals 0.5.

### In silico analysis of HPR variants

*In silico* site directed mutagenesis has been widely used to identify critical residue(s) for binding of a ligand/substrate or stability of protein. We have taken the coordinates of PDB ID 1DZA [16] for the structural analysis of HPR and its variants. Mutations in HPR were generated *in silico* using Swiss-Pdb Viewer Software [32]. The obtained computed structures of HPR variants were refined by energy minimization with CHARMM force field until the energy was reached [33]. The final predicted structures were evaluated sterically with PROCHECK [34]. The structures of HPR and its variants were drawn in PyMOL software [35] using the coordinates of both HPR and *in silico* mutated HPR variants. Contact distance of residues at 28, 38 and 39 position with that of other protein atoms was measured by the contact program from the CCP4 package [36].

### Author Contributions

Conceived and designed the experiments: JKB. Performed the experiments: MTR PD MIH. Analyzed the data: JKB FA. Contributed reagents/materials/analysis tools: JKB FA. Wrote the paper: PD JKB.

### References

- Beintema JJ, Breukelman HJ, Carsana A, Furia A (1997) Evolution of vertebrateribonucleases: Ribonuclease A superfamily. In: D'Alessio G, Riordin JF, eds. Ribonucleases: Structures and Functions. New York: Academic. pp 245–69.
- Libonati M, Sorrentino S (2001) Degradation of double-stranded RNA by mammalian pancreatic-type ribonucleases. *Methods Enzymol* 341: 234–248.
- Sorrentino S, Libonati M (1997) Structure-function relationships in human ribonucleases: main distinctive features of the major RNase types. *FEBS Lett* 404: 1–5.
- Lee-Huang S, Huang PL, Kung HF, Bliethe DL, Chen HC (1999) Lysozyme and RNases as anti-HIV components in beta-core preparations of human chorionic gonadotropin. *Proc Natl Acad Sci USA* 96: 2678–2681.
- Sorrentino S, Libonati M (1994) Human pancreatic type and nonpancreatic type ribonucleases: A direct side-by-side comparison of their catalytic properties. *Arch Biochem Biophys* 312: 340–348.
- Sorrentino S, Naddeo M, Russo A, D'Alessio G (2003) Degradation of double stranded RNA by human pancreatic ribonuclease: crucial role of non catalytic basic amino acid residues. *Biochemistry* 42: 10182–10190.
- Opitz JG, Ciglic MI, Haugg M, Trautwein-Fritz K, Railard SA, et al. (1998) Origin of the catalytic activity of bovine seminal ribonuclease against double-stranded RNA. *Biochemistry* 37: 4023–4033.
- Nicholson AW (1996) Structure, reactivity and biology of double-stranded RNA. *Progr Nucl Acids Res Mol Biol* 52: 1–65.
- Libonati M, Sorrentino S (1992) Revisiting the action of bovine ribonuclease A and pancreatic-type ribonucleases on double-stranded RNA. *Mol Cell Biochem* 117: 139–151.
- Libonati M, Gotte G (2004) Oligomerization of bovine ribonuclease A: structural and functional features of its multimers. *Biochem J* 380: 311–327.
- Jensen DE, von Hippel PH (1976) DNA “melting” proteins. *J Biol Chem* 251: 7198–7214.
- Dey P, Islam A, Ahmad F, Batra JK (2007) Role of unique basic residues of human pancreatic ribonuclease in its catalysis and structural stability. *Biochem Biophys Res Commun* 360: 809–814.
- Zhang J, Zhang YP, Rosenberg HF (2002) Adaptive evolution of a duplicated pancreatic ribonuclease gene in a leaf-eating monkey. *Nat Genet* 30: 411–415.
- Zhang J (2003) Parallel functional changes in digestive RNases of ruminants and colobines by divergent amino acid substitutions. *Mol Biol Evol* 20: 1310–1317.
- Gaur D, Seth D, Batra JK (2002) Glycine 38 is crucial for the ribonucleolytic activity of human pancreatic ribonuclease on double stranded RNA. *Biochem Biophys Res Commun* 297: 390–395.
- Pous J, Canals A, Terzyan SS, Guasch A, Benito A, et al. (2000) Three-dimensional structure of a human pancreatic ribonuclease variant, a step forward in the design of cytotoxic ribonucleases. *J Mol Biol* 303: 49–59.
- Kelly SM, Price NC (2000) The use of Circular Dichroism in the investigation of protein structure and function. *Curr Prot Prot Sci* 1: 349–384.

18. Richards FM, Wickoff HW (1971) in: *The enzymes* (PD Boyer, ed) Bovine pancreatic ribonuclease. 4: 647–806, New York: Academic Press.
19. Mitsui Y, Urata Y, Toni K, Irie M (1978) Studies on the binding of adenylyl-3', 5'-cytidine to ribonuclease. *Biochim Biophys Acta* 536: 299–308.
20. Iwahashi K, Nakamura K, Mitsui Y, Ohgi K, Irie M (1981) Further evidence for the existence of the p0 site in the active site of ribonuclease. The binding of thymidine 3',5'-diphosphate to ribonuclease. *J Biochem (Tokyo)* 90: 1685–1690.
21. Arus A, Paolillo L, Llorens R, Napolitano R, Pares X, et al. (1981) <sup>1</sup>H-NMR studies on the binding subsites of bovine pancreatic ribonuclease A. *Biochim Biophys Acta* 680: 117–127.
22. Irie M, Mikami F, Monma K, Ohgi K, Watanabe H, et al. (1984) Kinetic studies on the cleavage of oligouridylic acids and poly U by bovine pancreatic ribonuclease A. *J Biochem (Tokyo)* 98: 89–96.
23. Fontecilla-Camps JC, Llorens RD, le Du MH, Cuchillo CM (1994) Crystal structure of ribonuclease Ad(ApTpApApG) complex. *J Biol Chem* 269: 21526–21531.
24. Boix E, Nogues MV, Schein CH, Benner SA, Cuchillo CM (1994) Reverse transphosphorylation by ribonuclease A needs an intact p<sub>2</sub>' binding site. *J Biol Chem* 269: 2529–2534.
25. Fisher BM, Grilley JE, Raines RT (1998) A new remote subsite in ribonuclease A. *J Biol Chem* 273: 34134–34138.
26. Fisher BM, Ha J, Raines RT (1998) Coulombic forces in protein-RNA interactions: Binding and cleavage by Ribonuclease A and variants at Lys7, Arg10, and Lys66. *Biochemistry* 37: 12121–12132.
27. Larson SB, Day JS, Nguyen C, Cudney R, McPherson A (2010) Structure of bovine pancreatic ribonuclease complexed with uridine 5'-monophosphate at 1.60 Å resolution. *Acta Crystallogr Sect F Struct Biol Cryst Commun* 66: 113–120.
28. McPherson A, Brayer G, Cascio D, Williams R (1986) The mechanism of binding of a polynucleotide chain to pancreatic ribonuclease. *Science* 232: 765–768.
29. Bal HP, Batra JK (1997) Human pancreatic ribonuclease: deletion of the carboxyl-terminal EDST extension enhances ribonuclease activity and thermostability. *Eur J Biochem* 245: 465–469.
30. Gaur D, Swaminathan S, Batra JK (2001) Interaction of human pancreatic ribonuclease with human ribonuclease inhibitor Generation of inhibitor-resistant cytotoxic variants. *J Biol Chem* 276: 24978–24984.
31. Buchner J, Pastan I, Brinkmann U (1992) Method for increasing the yield of properly folded recombinant fusion proteins: single-chain immunotoxins from renaturation of bacterial inclusion bodies. *Anal Biochem* 205: 263–270.
32. Guex N, Peitsch MC (1997) SWISS-MODEL and the Swiss-PdbViewer: an environment for comparative protein modelling. *Electrophoresis* 18: 2714–2723.
33. Patel S, Mackerell AD Jr., Brooks CL III (2004) CHARMM fluctuating charge force field for proteins: II protein/solvent properties from molecular dynamics simulations using a nonadditive electrostatic model. *J Comput Chem* 25: 1504–1514.
34. Laskowski RA, Rullmannn JA, MacArthur MW, Kaptein R, Thornton JM (1996) AQUA and PROCHECK-NMR: programs for checking the quality of protein structures solved by NMR. *J Biomol NMR* 8: 477–486.
35. DeLano WL (2005) The case for open-source software in drug discovery. *Drug Discov Today* 10: 213–217.
36. (1994) The CCP4 suite: programs for protein crystallography. *Acta Crystallogr D Biol Crystallogr* 50: 760–763.
